# 1,25-Dihydroxyvitamin D and the Vitamin D Receptor Gene Polymorphism Apa1 Influence Bone Mineral Density in Primary Hyperparathyroidism

Monika H. E. Christensen<sup>1,2\*</sup>, Ellen M. Apalset<sup>3,4</sup>, Yngve Nordbø<sup>5</sup>, Jan Erik Varhaug<sup>5,6</sup>, Gunnar Mellgren<sup>1,2</sup>, Ernst A. Lien<sup>1,2</sup>

**1** Institute of Medicine, University of Bergen, Bergen, Norway, **2** Hormone Laboratory, Haukeland University Hospital, Bergen, Norway, **3** Department of Rheumatology, Haukeland University Hospital, Bergen, Norway, **4** Department of Public Health and Primary Health Care, Research Group for Lifestyle Epidemiology, University of Bergen, Bergen, Norway, **5** Department of Surgery, Haukeland University Hospital, Bergen, Norway, **6** Department of Surgical Science, University of Bergen, Bergen, Norway

## Abstract

**Objective:** Parathyroid hormone (PTH) and vitamin D are the most important hormones regulating calcium metabolism. In primary hyperparathyroidism (PHPT) excessive amounts of PTH are produced. Bone turnover is enhanced, leading to reduced bone mineral density and elevated levels of serum calcium. The aim of this study was to investigate relations between serum levels of 25-hydroxyvitamin D (25(OH)D), 1,25-dihydroxyvitamin D (1,25(OH)<sub>2</sub>D) and bone mineral density, as well as known genetic polymorphisms in the vitamin D receptor and enzymes metabolising vitamin D in patients with PHPT.

**Design/Subjects:** We conducted a cross-sectional study of 52 patients with PHPT.

**Results:** Mean level of 25(OH)D was 58.2 nmol/L and median 1,25(OH)<sub>2</sub>D level was 157 pmol/L. Among our patients with PHPT 36.5% had 25(OH)D levels below 50 nmol/L. Serum 1,25(OH)<sub>2</sub>D was inversely correlated to bone mineral density in distal radius ( $p=0.002$ ), but not to bone mineral density at lumbar spine or femoral neck. The vitamin D receptor polymorphism Apa1 (rs7975232) was associated with bone mineral density in the lumbar spine.

**Conclusions:** The results suggest that PHPT patients with high blood concentrations of 1,25(OH)<sub>2</sub>D may have the most deleterious skeletal effects. Randomized, prospective studies are necessary to elucidate whether vitamin D supplementation additionally increases serum 1,25(OH)<sub>2</sub>D and possibly enhances the adverse effects on the skeleton in patients with PHPT.

**Citation:** Christensen MHE, Apalset EM, Nordbø Y, Varhaug JE, Mellgren G, et al. (2013) 1,25-Dihydroxyvitamin D and the Vitamin D Receptor Gene Polymorphism Apa1 Influence Bone Mineral Density in Primary Hyperparathyroidism. PLoS ONE 8(2): e56019. doi:10.1371/journal.pone.0056019

**Editor:** Andrzej T. Slominski, University of Tennessee, United States of America

**Received:** November 21, 2012; **Accepted:** January 9, 2013; **Published:** February 13, 2013

**Copyright:** © 2013 Christensen et al. This is an open-access article distributed under the terms of the Creative Commons Attribution License, which permits unrestricted use, distribution, and reproduction in any medium, provided the original author and source are credited.

**Funding:** Funding for this project was provided by Samarbeidsorganet Helse Vest RHF (<http://helse-bergen.no/forskning/samarbeidsorganet>). The funders had no role in study design, data collection and analysis, decision to publish, or preparation of the manuscript.

**Competing Interests:** The authors have declared that no competing interests exist.

\* E-mail: monika.christensen@med.uib.no

## Introduction

Primary hyperparathyroidism (PHPT) is characterized by elevated serum levels of parathyroid hormone (PTH) and calcium. In most cases PHPT is caused by a benign adenoma or glandular hyperplasia producing excessive amounts of PTH [1]. Elevated levels of PTH increase calcium resorption in the kidneys, leading to hyper-calcemia, while phosphate excretion is enhanced. Bone turnover is enhanced, reducing bone mineral density (BMD) and elevating levels of bone markers [2]. Increased fracture risk is described in PHPT patients [3].

To become metabolically active, vitamin D has to be hydroxylated by cytochrome P450 enzymes (Figure 1). The major circulating form of vitamin D, 25-hydroxyvitamin D (25(OH)D), is formed in the liver. 25(OH)D is the most commonly used indicator of vitamin D status, reflecting the storage of the vitamin [4]. Further hydroxylation to 1,25-dihydroxyvitamin D (1,25(OH)<sub>2</sub>D) is catalysed by the 1 $\alpha$ -hydroxylase. This enzyme is mainly localised

in the kidneys but is also found in other tissues [5]. The activity of the 1 $\alpha$ -hydroxylase is controlled by PTH and 1,25(OH)<sub>2</sub>D keeping serum levels of 1,25(OH)<sub>2</sub>D fairly constant [6,7]. In PHPT-patients, high levels of PTH increase the activity of 1 $\alpha$ -hydroxylase. Vitamin D inadequacy seems to be more frequent in PHPT patients than in the background population [8,9]. Low levels of 25(OH)D in these patients may be explained through increased activity of both the 1 $\alpha$ -hydroxylase and the 24-hydroxylase [7,10,11].

Environmental factors like exposure to sunlight, nutrition, and seasonal variation influence vitamin D status [12,13,14], though, individual variations in vitamin D-concentrations are not fully explained by external factors. Twin studies have shown individual differences in bone formation, bone resorption, calcium homeostasis, concentrations of PTH and vitamin D due to genetic variation [15]. Influences of single nucleotide polymorphisms (SNPs) are independent of lifestyle and are life long. Differences in BMD, vitamin D-metabolism and calcium levels in patients with

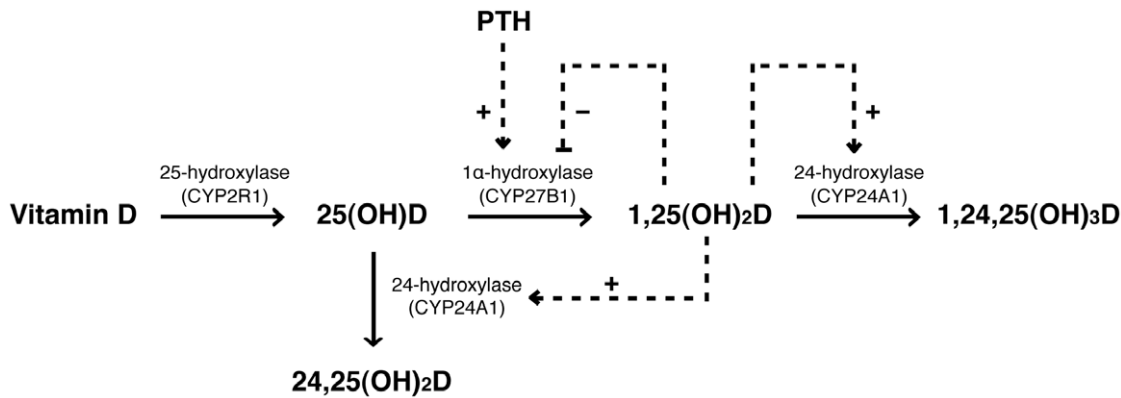

**Figure 1. Vitamin D metabolism.** 1,25(OH)<sub>2</sub>D and PTH influence vitamin D metabolism by positive (+) or negative (-) regulation of the activity of the 1α-hydroxylase and the 24-hydroxylase. 25(OH)D, 25-hydroxyvitamin D; 1,25(OH)<sub>2</sub>D, 1,25-dihydroxyvitamin D; 24,25(OH)<sub>2</sub>D, 24,25-dihydroxyvitamin D; 1,24,25(OH)<sub>3</sub>D, 1,24,25-trihydroxyvitamin D. doi:10.1371/journal.pone.0056019.g001

PHPT could be explained by genetic variation in enzymes metabolising vitamin D. Furthermore, 1,25(OH)<sub>2</sub>D is a ligand for the intra-nuclear vitamin D receptor (VDR) that regulates gene transcription of vitamin D responsive genes [16]. Accordingly, polymorphisms in the VDR-gene may have an influence on vitamin D-sensitive tissues, such as bone [17].

The aim of this study was to investigate serum levels of 25(OH)D and 1,25(OH)<sub>2</sub>D and the influence of these vitamin D metabolites on BMD in patients with PHPT. We also investigated whether common SNPs in enzymes important in the vitamin D metabolism and the VDR could explain individual differences in disease severity, especially regarding BMD. We observed an inverse correlation between BMD in distal radius and concentrations of 1,25(OH)<sub>2</sub>D. Additionally, we found that BMD in lumbar spine was associated with the Apa1 polymorphism in the VDR gene.

## Materials and Methods

### Ethics Statement

The study was performed according to the principles expressed in the declaration of Helsinki. All enrolled subjects signed an informed written consent. The Western Norway Regional Committee for Medical Research Ethics (REK) approved the study.

### Subjects and Study Design

52 patients (42 females and 10 males) scheduled to undergo surgery for PHPT participated in the study. Patients included had PHPT caused by either single adenomas (85%) or multi-glandular hyperplasia (15%). PHPT was histologically confirmed in all patients. The diagnosis of PHPT was based on serum levels of ionised calcium above the reference range (reference range: 1.15–1.30 mmol/L) and PTH-levels that were elevated or in the upper third of the reference range (reference range: 1.3–6.8 pmol/L). The recruitment period was from September 2007 to May 2010. Inclusion was consecutive and equally distributed throughout the year. Exclusion criteria were known inflammatory bowel disease, rheumatoid disease or lack of BMD-measurements. Patients with genetically confirmed multiple endocrine neoplasia type 1 (MEN-1 syndrom) or type 2a (MEN-2a syndrom) based on verified mutations in the *MEN1* gene or *RET* gene, respectively, were excluded. During the study period, all included patients lived in the Western coastal part of Norway and underwent surgery at the

Department of Endocrine Surgery, Haukeland University Hospital, Bergen, Norway. Blood samples, anthropometric data and medical history were collected the day before parathyroidectomy. BMD was measured within 4 months prior to surgery.

### Biochemical Analysis and Anthropometric Data

Blood samples from patients were centrifuged and frozen at -80°C within 2 hours after collection. Ionised calcium, albumin, phosphate, alkaline phosphatase (ALP), alanine transaminase (ALAT), and C-reactive protein (CRP) were analysed immediately at the Laboratory of Clinical Biochemistry, Haukeland University Hospital, Bergen, Norway, using the Modular P-system from Roche Diagnostics, Basel, Switzerland. PTH was measured at the Hormone Laboratory, Haukeland University Hospital, Bergen, Norway, using a two-site chemiluminescent immunometric assay for intact PTH (Immulite 2000, Siemens Healthcare Diagnostics, Deerfield, IL, USA). The inter-assay variations were 6.3% at a concentration of 5.6 pmol/L and 8.8% at 40 pmol/L. Plasma concentrations of 25(OH)D were analysed with a liquid chromatography/tandem mass spectrometry (LC-MS/MS) method developed at the Hormone Laboratory, Haukeland University Hospital, Bergen, Norway [18]. 25(OH)D<sub>3</sub> and 25(OH)D<sub>2</sub> were measured separately using this method. A radioimmunoassay kit from Immunodiagnostic system, Boldon, UK, was used for analysing 1,25(OH)<sub>2</sub>D. This assay had a sensitivity of 100% for 1,25(OH)<sub>2</sub>D<sub>3</sub> and 91% for 1,25(OH)<sub>2</sub>D<sub>2</sub>. Detection limit was 8 pmol/L for 1,25(OH)<sub>2</sub>D and the inter-assay variations were 13.6%, 9.6% and 9.6% for concentrations of 20.5 pmol/L, 60.8 pmol/L and 135.2 pmol/L, respectively. Creatinine was determined by including it and its deuterated internal standard (d3-creatinine) in an established LC-MS/MS assay using the ion pairs 114/44.2 and 117/47.2, respectively [19]. Creatinine was analysed at Bevitall A/S, Bergen, Norway. The isotope dilution mass spectrometry (IDMS) traceable formula developed by the Modification of Diet in Renal Disease (MDRD) Study Group was used for estimated glomerular filtration rate (eGFR) calculations:  $eGFR = 175 \times (s\text{-creatinine}/88.4)^{-1.154} \times (\text{Age})^{-0.203} \times 0.742$  if female [20]. Body mass index (BMI) was calculated as the weight divided through the square of the body length (kg/m<sup>2</sup>).

### Bone Mineral Density

BMD was measured at the Department of Rheumatology, Haukeland University Hospital, Bergen, Norway, using a stationary, dual energy X-ray absorptiometry (DXA) (Lunar Prodigy, GE

Healthcare, Diegem, Belgium). Calibration of the scanner was performed against a standard calibration block each day, and was stable during the whole measurement period. The *in vitro* long-term coefficient of variation was 0.86%, and the *in vivo* short-term precision for femoral neck was 1.47%. BMD in distal radius, lumbar spine (L2–L4) and femoral neck was available for 52 patients and BMD was measured within four months prior to surgery. Left distal radius was measured in all except four patients, where right radius was measured. Right femoral neck was used in all cases.

### Purification of DNA

Genomic leucocyte DNA was purified from EDTA-anticoagulated whole blood using the MagNa PURE LC instrument and the MagNa PURE LC DNA isolation kit (Roche Diagnostics, GmbH, Mannheim, Germany). Quality and concentration of DNA were measured using the NanoDrop® ND-100 spectrophotometer (NanoDrop Technologies, Wilmington, USA).

### Single Nucleotide Polymorphisms

Based on previous studies we selected 10 SNPs located in genes coding for 25-hydroxylase/CYP2R1 (rs10741657 and rs2060793), 24-hydroxylase/CYP24A1 (rs6013897 and rs2762939), 1 $\alpha$ -hydroxylase/CYP27B1 (rs10877012 and rs703895) and VDR (rs1544410 (Bsm1), rs731236 (Taq1), rs7975232 (Apa1), and rs2228570 (Fok1)) [21,22,23,24,25]. The nucleic acid sequences of the selected SNPs were found through the database <http://snpper.chip.org/>. SNPs and alleles were verified using the database <http://hapmap.ncbi.nlm.nih.gov/>. Kbioscience, Hoddesdon, UK, analysed the selected SNPs from purified DNA, using the Allele-Specific Polymorphism (KASP) genotyping system (<http://www.kbioscience.co.uk>).

### Statistical Analysis

Continuous variables are reported as mean (standard deviation) or median (25<sup>th</sup> to 75<sup>th</sup> percentile) and categorical variables as counts (percentages). PTH, ALP, ALAT, and 1,25(OH)<sub>2</sub>D did not show normal distribution and values were logarithmically transformed before used in statistical tests. Differences across the tertiles of 25(OH)D, 1,25(OH)<sub>2</sub>D and PTH were calculated using linear regression. Age, gender and BMI were included as covariates when analysing BMD in distal radius, lumbar spine and femoral neck. For differences across the tertiles of 25(OH)D, age and BMI were covariates as these differed between the 25(OH)D-tertiles. To assess differences in gender across the tertiles, a chi-square test was used. Additionally, multiple linear regression was performed with BMD in distal radius, lumbar spine and femoral neck as the dependent variable, using age, BMI, gender, phosphate, eGFR, ionised calcium, 25(OH)D, 1,25(OH)<sub>2</sub>D, and PTH as covariates. Time of blood sampling was grouped using categorical variables for winter (January to March), spring (April to June), summer (July to September) and autumn (October to December). Season was used as a covariate in the linear regression model. Correlations were assessed by Spearman's rho test. Associations between SNP-variants and BMD at the forearm, lumbar spine and right femoral neck were assessed using linear regression. These tests were performed once assuming that minor allele was dominant and once assuming that minor allele was recessive. All analysis including BMD in distal radius, lumbar spine and femoral neck were adjusted for age, gender and BMI, as these parameters are strong predictors of BMD [26,27]. All tests were two-sided and  $p < 0.05$  was considered statistically significant. In the SNP-analysis, correction for multiple testing was performed using the Bonferroni method. Thus, where

multiple SNPs were analysed a correction factor of 7 (7 SNPs included in the analyses) was used. After Bonferroni-correction a  $p$ -value  $< 0.007$  was required for statistical significance. Statistical analyses were performed using SPSS Statistics 19 for Mac (IBM Corporation, New York, USA).

Linkage disequilibrium for the selected genes was checked with the free internet-based program haploview (version 2, release 21, [www.broad.mit.edu/mpg/haploview/](http://www.broad.mit.edu/mpg/haploview/)). Calculations of Hardy Weinberg equilibrium for the tested SNPs were based on a chi-squared test, assessed with the internet-based software PLINK (version 1.0, <http://pngu.mgh.harvard.edu/purcell/plink/>) [28].

## Results

### Subject Characteristics

Characteristics of the included 52 patients are listed in table 1. 25(OH)D levels below 50 nmol/L were observed in 36.5% of the patients. Median 1,25(OH)<sub>2</sub>D-level was 157 pmol/L, which is above the reference range (50–150 pmol/L). None of the patients had detectable serum level of 25(OH)D<sub>2</sub> and none of the patients used vitamin D supplements prescribed by a physician. Seven patients had eGFR under 60 mL/min/1.73m<sup>2</sup> (reference range:  $> 60$  mL/min/1.73m<sup>2</sup>).

### Relationship between 25(OH)D, 1,25(OH)<sub>2</sub>D, PTH and Bone Mineral Density

Patients were divided into tertiles according to levels of 25(OH)D (Table 2), 1,25(OH)<sub>2</sub>D (Table 3) and PTH (Table 4). Radial BMD decreased significantly across increasing tertiles of 1,25(OH)<sub>2</sub>D and PTH. 1,25(OH)<sub>2</sub>D increased with increasing PTH. eGFR differed significantly across the tertiles of 1,25(OH)<sub>2</sub>D, with lowest levels in the group with lowest 1,25(OH)<sub>2</sub>D concentrations. No differences in albumin, ALAT and CRP were found according to tertiles of either 25(OH)D, 1,25(OH)<sub>2</sub>D or PTH (data not shown). When analysing a subgroup including only the 45 patients with eGFR  $> 60$  mL/min/

**Table 1.** Patient characteristics at inclusion (n = 52).

| Characteristics                         |      |             |
|-----------------------------------------|------|-------------|
| <b>Females (%)<sup>a</sup></b>          | 42   | (80.8)      |
| <b>Age (years)</b>                      | 60.8 | (12.7)      |
| <b>25(OH)D (nmol/L)</b>                 | 58.2 | (21.5)      |
| <b>1,25(OH)<sub>2</sub>D (pmol/L)</b>   | 157  | (130–197.5) |
| <b>BMI (kg/m<sup>2</sup>)</b>           | 26.4 | (4.20)      |
| <b>PTH (pmol/L)</b>                     | 13.1 | (9.63–18.5) |
| <b>iCa (mmol/L)</b>                     | 1.48 | (0.092)     |
| <b>Phosphate (mmol/L)</b>               | 0.84 | (0.17)      |
| <b>Albumin (g/L)</b>                    | 45.6 | (2.66)      |
| <b>ALP (U/L)</b>                        | 85.5 | (73.3–117)  |
| <b>eGFR (mL/min/1.73 m<sup>2</sup>)</b> | 84.0 | (22.1)      |
| <b>ALAT (U/L)</b>                       | 26.0 | (18.3–31.8) |
| <b>CRP (mg/L)</b>                       | 1.0  | (0.10–2.0)  |

Values are given as mean (SD) or median (25<sup>th</sup> to 75<sup>th</sup> percentile). PHPT, primary hyperparathyroidism; BMI, body-mass index; PTH, parathyroid hormone; iCa, ionised calcium; ALP, alkaline phosphatase; eGFR, estimated glomerular filtration rate; ALAT, alanine transaminase; CRP, C-reactive protein; 25(OH)D, 25-hydroxyvitamin D; 1,25(OH)<sub>2</sub>D, 1,25-dihydroxyvitamin D.

<sup>a</sup>Values are numbers (percentages).

doi:10.1371/journal.pone.0056019.t001

1.73m<sup>2</sup>, age did not differ between the tertiles of 25(OH)D (p=0.12), and eGFR did not differ between the tertiles of 1,25(OH)<sub>2</sub>D (p=0.073). Examining only these patients did not change the results regarding differences in BMD in distal radius, lumbar spine and femoral neck across any of the tertiles compared to analysing all 52 patients. We therefore decided to include all patients in the further analyses. Additional adjustment for season when blood samples were drawn did not change any of the results (data not shown).

In addition to studying variations across tertiles, we also analysed correlations between parameters using Spearman's rho test, adjusted for age, gender and BMI when including BMD. We observed a negative correlation between BMD in distal radius and 1,25(OH)<sub>2</sub>D (r = -0.470, p = 0.001), while BMD in distal radius and PTH was not significantly correlated (r = -0.287, p = 0.062). PTH and 1,25(OH)<sub>2</sub>D were positively correlated (r = 0.412, p = 0.002) as were also 1,25(OH)<sub>2</sub>D and eGFR (r = 0.340, p = 0.014). We did not observe a correlation between 25(OH)D and 1,25(OH)<sub>2</sub>D, 25(OH)D and PTH, or 25(OH)D and BMD at any of the measured sites. ALP and iCa were positively correlated (r = 0.282, p = 0.043). Interestingly, 25(OH)D levels increased with age (r = 0.293, p = 0.035).

Multiple linear regression with age, BMI, gender, phosphate, ionised calcium, eGFR, 25(OH)D, 1,25(OH)<sub>2</sub>D, and PTH as covariates did not show an influence of 25(OH)D, 1,25(OH)<sub>2</sub>D or PTH on BMD in femoral neck and lumbar spine. 1,25(OH)<sub>2</sub>D was significantly associated with BMD in distal radius (standardised beta (effect size) = -0.28, p = 0.010). In this model PTH was not associated with BMD in distal radius (standardised beta = -0.024, p = 0.84). Age, gender, and BMI contributed significantly to differences in BMD in distal radius, whereas only age and BMI were associated with BMD in femoral neck and lumbar spine. Phosphate, ionised calcium, and eGFR did not contribute to differences in BMD at any of the investigated sites.

### Single Nucleotide Polymorphisms

None of the selected SNPs differed significantly from Hardy-Weinberg equilibrium. There was strong linking disequilibrium (LD) between several of the SNPs with gene location in the proximity of each other. Where LD was >0.8, only one of the SNPs was selected for further analysis. Rs10741657 on chromosome 11 in the 25-hydroxylase-gene was in LD with rs2060793 (r<sup>2</sup> = 1.0). The SNP in the 1α-hydroxylase-gene, rs703842 on chromosome 12 was in LD with rs10877012 (r<sup>2</sup> = 1.0). For the VDR-gene, rs1544410 localised on chromosome 12 was in LD with rs731236 (r<sup>2</sup> = 0.96). 7 tag SNPs were selected for further analysis (Table 5). Several of the studied SNPs showed trends towards variation in BMD (Table 6). Only the SNP variant rs7975232 (Apa1) in the VDR showed a significant influence on BMD in lumbar spine after Bonferroni correction. When considering the minor allele (allele A) as dominant, we observed significant lower lumbar spine BMD in patients with genotype AA/CA vs. CC. We did not observe a relation between SNP genotypes and any of the biochemical parameters analysed (data not shown).

### Discussion

The main finding of the present study was the inverse correlation between serum 1,25(OH)<sub>2</sub>D and BMD in distal radius in patients with PHPT, indicating that high serum levels of 1,25(OH)<sub>2</sub>D may have deleterious skeletal effects. Moreover, we observed an association between BMD in the lumbar spine and the VDR polymorphism Apa1.

The observed inverse correlation between 1,25(OH)<sub>2</sub>D and BMD in distal radius is in accordance with a study from Denmark, where high levels of 1,25(OH)<sub>2</sub>D in PHPT-patients were associated with increased bone turnover and decreased BMD [29]. PTH also seemed to influence BMD in distal radius. However, using multiple regression with age, gender, BMI,

**Table 2.** Patients divided into tertiles according to serum levels of 25(OH)D.

|                                       | Tertiles of 25(OH)D          |             |                              |             |                               |             | p-value            |
|---------------------------------------|------------------------------|-------------|------------------------------|-------------|-------------------------------|-------------|--------------------|
|                                       | Range: 22–47 nmol/L (n = 17) |             | Range: 47–65 nmol/L (n = 18) |             | Range: 67–115 nmol/L (n = 17) |             |                    |
| Females (%) <sup>a</sup>              | 13                           | (76.5)      | 16                           | (88.9)      | 13                            | (76.5)      | 0.56               |
| Age                                   | 55.9                         | (14.7)      | 61.4                         | (11.3)      | 64.9                          | (10.8)      | 0.038              |
| BMI (kg/m <sup>2</sup> )              | 28.0                         | (4.12)      | 26.1                         | (3.47)      | 24.9                          | (4.47)      | 0.013 <sup>b</sup> |
| 1,25(OH) <sub>2</sub> D (pmol/L)      | 151                          | (124–205)   | 138                          | (122–198)   | 172                           | (146–193)   | 0.32 <sup>c</sup>  |
| PTH (pmol/L)                          | 15.0                         | (8.55–23.4) | 12.8                         | (9.55–18.9) | 12.7                          | (10.4–16.6) | 0.28 <sup>c</sup>  |
| iCa (mmol/L)                          | 1.52                         | (0.09)      | 1.47                         | (0.09)      | 1.44                          | (0.09)      | 0.069 <sup>c</sup> |
| Phosphate (mmol/L)                    | 0.81                         | (0.15)      | 0.90                         | (0.20)      | 0.80                          | (0.13)      | 0.23 <sup>c</sup>  |
| eGFR (mL/min/1.73 m <sup>2</sup> )    | 91.7                         | (19.8)      | 83.0                         | (22.4)      | 77.4                          | (22.9)      | 0.096 <sup>c</sup> |
| ALP (U/L)                             | 94.0                         | (75.5–124)  | 89.0                         | (68.5–108)  | 86.0                          | (72.5–114)  | 0.35 <sup>c</sup>  |
| BMD radius (g/cm <sup>2</sup> )       | 0.50                         | (0.11)      | 0.46                         | (0.11)      | 0.45                          | (0.10)      | 0.55 <sup>d</sup>  |
| BMD lumbar spine (g/cm <sup>2</sup> ) | 1.12                         | (0.17)      | 1.03                         | (0.19)      | 1.06                          | 0.19)       | 0.42 <sup>d</sup>  |
| BMD femoral neck (g/cm <sup>2</sup> ) | 0.86                         | (0.13)      | 0.77                         | (0.12)      | 0.79                          | (0.10)      | 0.62 <sup>d</sup>  |

Values are given as mean (standard deviation) or median (25th–75th percentile). PTH, 1,25(OH)<sub>2</sub>D and ALP were log-transformed before used in the analyses. BMI, body mass index; PHPT, primary hyperparathyroidism; PTH, parathyroid hormone; iCa, ionised calcium; APL, alkaline phosphatase; 25(OH)D, 25-hydroxyvitamin D; 1,25(OH)<sub>2</sub>D, 1,25-dihydroxyvitamin D; eGFR, estimated glomerular filtration rate; BMD, bone mineral density. P-values for linear trend over tertiles.

<sup>a</sup>Values are numbers (percentages), differences across tertiles are assessed with a chi-square test.

<sup>b</sup>Age was used as covariate.

<sup>c</sup>Age and BMI were used as covariates.

<sup>d</sup>Age, BMI and gender were used as covariates.

doi:10.1371/journal.pone.0056019.t002

**Table 3.** Patients divided into tertiles according to serum levels of 1,25(OH)<sub>2</sub>D.

|                                       | Tertiles of 1,25(OH) <sub>2</sub> D |             |                              |             |                              |             | p-value            |
|---------------------------------------|-------------------------------------|-------------|------------------------------|-------------|------------------------------|-------------|--------------------|
|                                       | Range: 48–137 pmol/L n = 17         |             | Range: 138–176 pmol/L n = 18 |             | Range: 179–350 pmol/L n = 17 |             |                    |
| Females (%) <sup>a</sup>              | 13                                  | (76.4)      | 14                           | (77.8)      | 15                           | (88.2)      | 0.63               |
| Age                                   | 60.5                                | (12.3)      | 61.1                         | (10.6)      | 60.6                         | (15.5)      | 0.99               |
| BMI (kg/m <sup>2</sup> )              | 26.1                                | (3.66)      | 26.8                         | (5.09)      | 26.2                         | (3.79)      | 0.96               |
| 25(OH)D (nmol/L)                      | 47.7                                | (15.7)      | 67.6                         | (21.2)      | 58.6                         | (23.2)      | 0.14               |
| PTH (pmol/L)                          | 11.4                                | (8.70–15.2) | 11.2                         | (8.60–14.1) | 18.2                         | (12.5–24.8) | 0.011              |
| iCa (mmol/L)                          | 1.48                                | (0.09)      | 1.46                         | (0.08)      | 1.51                         | (0.10)      | 0.29               |
| Phosphate (mmol/L)                    | 0.90                                | (0.17)      | 0.83                         | (0.13)      | 0.80                         | (0.18)      | 0.062              |
| eGFR (mL/min/1.73 m <sup>2</sup> )    | 76.8                                | (21.3)      | 81.9                         | (20.7)      | 93.3                         | (22.3)      | 0.029              |
| ALP (U/L)                             | 80.0                                | (70.0–97.0) | 99.0                         | (73.3–124)  | 89.0                         | (79.5–125)  | 0.30               |
| BMD radius (g/cm <sup>2</sup> )       | 0.48                                | (0.11)      | 0.50                         | (0.80)      | 0.41                         | (0.11)      | 0.002 <sup>d</sup> |
| BMD lumbar spine (g/cm <sup>2</sup> ) | 1.04                                | (0.19)      | 1.09                         | (0.15)      | 1.07                         | (0.22)      | 0.66 <sup>d</sup>  |
| BMD femoral neck (g/cm <sup>2</sup> ) | 0.77                                | (0.12)      | 0.82                         | (0.10)      | 0.82                         | (0.14)      | 0.11 <sup>d</sup>  |

Values are given as mean (standard deviation) or median (25th–75th percentile). PTH, 1,25(OH)<sub>2</sub>D and ALP were log-transformed before used in the analyses. BMI, body mass index; PHPT, primary hyperparathyroidism; PTH, parathyroid hormone; iCa, ionised calcium; APL, alkaline phosphatase; 25(OH)D, 25-hydroxyvitamin D; 1,25(OH)<sub>2</sub>D, 1,25-dihydroxyvitamin D; eGFR, estimated glomerular filtration rate; BMD, bone mineral density. P-values for linear trend over tertiles.

<sup>a</sup>Values are numbers (percentages), differences across tertiles are assessed with a chi-square test.

<sup>d</sup>Age, BMI and gender were used as covariates.

doi:10.1371/journal.pone.0056019.t003

calcium, phosphate, eGFR, 25(OH)D, 1,25(OH)<sub>2</sub>D, and PTH as covariates, the influence of PTH on BMD in distal radius disappeared, whereas the influence of 1,25(OH)<sub>2</sub>D was still significant. Goltzman et al. showed that the 1,25(OH)<sub>2</sub>D/VDR-system is required for an appropriate osteoclast response to elevated PTH [6]. Both 1,25(OH)<sub>2</sub>D and PTH increase the expression of Receptor Activator NF-κB Ligand (RANKL) from osteoblasts [30,31]. In turn, RANKL stimulates the maturation of osteoclasts resulting in enhanced bone resorption [31,32]. Physiological concentrations of 1,25(OH)<sub>2</sub>D inhibit PTH-induced

release of RANKL in osteoblasts, while supra-physiological levels of 1,25(OH)<sub>2</sub>D further increase the RANKL-release [30]. This suggests that serum concentrations of 1,25(OH)<sub>2</sub>D above a certain threshold may result in adverse effects on bone [33]. Bone loss in PHPT-patients occurs mainly at sites with high proportion of cortical bone, such as distal radius, while bone loss in trabecular bone, such as lumbar spine, is less prominent [34,35,36]. An effect on cortical bone prior to trabecular bone is in line with our findings.

**Table 4.** Patients divided into tertiles according to serum levels of PTH.

|                                       | Tertiles of PTH               |            |                                |            |                                |            | p-value            |
|---------------------------------------|-------------------------------|------------|--------------------------------|------------|--------------------------------|------------|--------------------|
|                                       | Range: 5.6–10.5 pmol/L n = 17 |            | Range: 10.8–15.8 pmol/L n = 18 |            | Range: 17.5–51.3 pmol/L n = 17 |            |                    |
| Females (%) <sup>a</sup>              | 13                            | (76.4)     | 15                             | (83.3)     | 14                             | (82.4)     | 0.86               |
| Age                                   | 59.8                          | (11.7)     | 60.7                           | (10.8)     | 61.8                           | (15.8)     | 0.65               |
| BMI (kg/m <sup>2</sup> )              | 27.3                          | (4.41)     | 25.0                           | (3.58)     | 27.0                           | (4.50)     | 0.75               |
| 25(OH)D (nmol/L)                      | 55.5                          | (18.1)     | 62.4                           | (23.4)     | 56.3                           | (23.2)     | 0.92               |
| 1,25(OH) <sub>2</sub> D (pmol/L)      | 140                           | (99.5–159) | 159                            | (128–179)  | 204                            | (138–246)  | <0.001             |
| iCa (mmol/L)                          | 1.43                          | (0.07)     | 1.47                           | (0.08)     | 1.55                           | (0.08)     | <0.001             |
| Phosphate (mmol/L)                    | 0.90                          | (0.16)     | 0.85                           | (0.17)     | 0.77                           | (0.15)     | 0.017              |
| eGFR (mL/min/1.73 m <sup>2</sup> )    | 87.1                          | (19.0)     | 81.9                           | (19.6)     | 83.1                           | (27.8)     | 0.598              |
| ALP (U/L)                             | 89.0                          | (69.0–105) | 81.0                           | (72.5–123) | 90.0                           | (81.5–127) | 0.42               |
| BMD radius (g/cm <sup>2</sup> )       | 0.50                          | (0.08)     | 0.47                           | (0.10)     | 0.43                           | (0.13)     | 0.027 <sup>d</sup> |
| BMD lumbar spine (g/cm <sup>2</sup> ) | 1.06                          | (0.14)     | 1.09                           | (0.22)     | 1.05                           | (0.19)     | 0.67 <sup>d</sup>  |
| BMD femoral neck (g/cm <sup>2</sup> ) | 0.81                          | (0.13)     | 0.80                           | (0.9)      | 0.80                           | (0.15)     | 0.19 <sup>d</sup>  |

Values are given as mean (standard deviation) or median (25th–75th percentile). PTH, 1,25(OH)<sub>2</sub>D and ALP were log-transformed before used in the analyses. BMI, body mass index; PHPT, primary hyperparathyroidism; PTH, parathyroid hormone; iCa, ionised calcium; APL, alkaline phosphatase; 25(OH)D, 25-hydroxyvitamin D; 1,25(OH)<sub>2</sub>D, 1,25-dihydroxyvitamin D; eGFR, estimated glomerular filtration rate; BMD, bone mineral density. P-values for linear trend over tertiles.

<sup>a</sup>Values are numbers (percentages), differences across tertiles are assessed with a chi-square test.

<sup>d</sup>Age, BMI and gender were used as covariates.

doi:10.1371/journal.pone.0056019.t004

**Table 5.** Selected SNPs analysed in 52 individuals with primary hyperparathyroidism.

| rs number                                          | Genotype major/minor homozygote | Frequency major/minor homozygote | Included samples | HWE p-value |
|----------------------------------------------------|---------------------------------|----------------------------------|------------------|-------------|
| <b>VDR</b>                                         |                                 |                                  |                  |             |
| rs1544410 (Bsm1)                                   | GG/AA                           | 0.37/0.13                        | 52               | 0.44        |
| rs7975232 (Apa1)                                   | CC/AA                           | 0.21/0.18                        | 51               | 0.12        |
| rs2228570 (Fok1)                                   | CC/TT                           | 0.35/0.13                        | 52               | 0.27        |
| <b>25-hydroxylase (Cyp2R1)</b>                     |                                 |                                  |                  |             |
| rs10741657                                         | GG/AA                           | 0.44/0.21                        | 52               | 0.14        |
| <b>24-hydroxylase (Cyp24a1)</b>                    |                                 |                                  |                  |             |
| rs6013897                                          | TT/AA                           | 0.36/0.08                        | 52               | 0.19        |
| rs2762939                                          | GG/CC                           | 0.46/0.06                        | 52               | 0.21        |
| <b>1-<math>\alpha</math> hydroxylase (Cyp27B1)</b> |                                 |                                  |                  |             |
| Rs10877012                                         | GG/TT                           | 0.53/0.12                        | 51               | 0.25        |

Only samples without missing values were included in the analyses. P-values for Hardy Weinberg equilibrium are based on a chi-squared test. SNP, single nucleotide polymorphism; HWE, Hardy Weinberg equilibrium; VDR, vitamin D receptor.  
doi:10.1371/journal.pone.0056019.t005

The optimal concentration of vitamin D for beneficial health outcome is still subject for discussion [37,38]. Based on associations between 25(OH)D, BMD, bone turnover, muscular function and falls, serum levels of 25(OH)D below 50 nmol/L has been characterised as vitamin D inadequacy [39]. However, levels up to 75 nmol/L may still increase the beneficial effects of vitamin D on risk of falls, extremity strength, and prevention of cancer and hypertension [40]. It has been suggested that patients with mild PHPT and vitamin D insufficiency should receive supplementation of vitamin D to ensure 25(OH)D above 50 nmol/L [41,42]. In a recent study from England, Rao et al reported stable s-Ca levels in addition to a moderate decrease of PTH in patients with PHPT receiving vitamin D supplementation [43]. Furthermore, beneficial effects on bone metabolism with lowered ALP and increased BMD in lumbar spine and femoral neck was observed in vitamin D deficient PHPT patients after vitamin D supplementation [44,45]. It should be noted that in these studies showing beneficial effects of vitamin D supplementation on PTH levels and bone health, all patients had serum 25(OH)D below 50 nmol/L prior to supplementation [43,44,45]. In contrast, supplementation of 1,25(OH)<sub>2</sub>D increased bone turnover in a study on healthy individuals with mean level of 25(OH)D above 65 nmol/L [46]. This is in line with our findings that higher 1,25(OH)<sub>2</sub>D levels seem to have a deleterious effect on BMD in cortical bone. In the present study we did not observe as low levels of 25(OH)D as described in French and Danish studies on PHPT, where more than 80% of the patients had 25(OH)D serum concentrations below 50 nmol/L [8,9]. In patients with PHPT, 25(OH)D concentrations are found to be a strong determinant for levels of 1,25(OH)<sub>2</sub>D, showing a positive correlation between 25(OH)D and 1,25(OH)<sub>2</sub>D [47]. Initial levels of 25(OH)D and 1,25(OH)<sub>2</sub>D are probably decisive as to whether vitamin D supplementation has beneficial or deleterious skeletal effects.

Both PTH and 1,25(OH)<sub>2</sub>D regulate cytochrome P450 enzymes metabolising vitamin D. SNPs in genes encoding these enzymes are of particular interest in patients with PHPT, where the production of both PTH and 1,25(OH)<sub>2</sub>D is enhanced. According to Wang et al [25], rs10741657 is the locus in the 25-hydroxylase gene with strongest association to 25(OH)D levels. Wang et al also showed an association between 25(OH)D levels and the SNP rs6013897 in the 24-hydroxylase gene. Furthermore, an associa-

tion with the SNP rs2762939 in the 24-hydroxylase gene and risk of coronary artery calcification was shown. However, this SNP was not correlated to 25(OH)D levels [22]. Rs10877012 in the 1 $\alpha$ -hydroxylase gene has also been associated with 25(OH)D levels [21]. In the present study none of these SNPs were associated with levels of 25(OH)D, 1,25(OH)<sub>2</sub>D, PTH, serum calcium or BMD. We observed levels of 1,25(OH)<sub>2</sub>D, the ligand for the VDR, above the reference range in the patients with PHPT. The influence of SNPs in the VDR-gene on bone metabolism could therefore be stronger in patients with PHPT than in a healthy population. Our analyses of the most common SNPs in the VDR revealed an association for the different genotypes of the Apa1 polymorphism (rs7975232) and BMD in the lumbar spine. The minor allele was associated with lower BMD in the lumbar spine. A previous study on osteoporotic women has also shown a relationship between the minor allele of the Apa1 polymorphism and lower BMD in lumbar spine [48]. In twin studies a stronger influence of genetic factors on BMD in the trabecular than the cortical skeleton is observed [49]. This is in accordance with the findings in our study where BMD in lumbar spine, consisting mainly of trabecular bone, but not distal radius, consisting mainly of cortical bone, was influenced by the Apa1 polymorphism. The levels of 1,25(OH)<sub>2</sub>D were not associated with the Apa1 polymorphisms. Thus, it may appear that the effect of the Apa1 polymorphism on BMD in trabecular bone is different from the bone-resorbing effect of 1,25(OH)<sub>2</sub>D on cortical bone. The association between BMD in lumbar spine and the Apa1 polymorphism has to our knowledge not been observed in PHPT patients before. However, further studies are needed to assess if patients with the minor allele of the Apa1 polymorphism have an increased fracture risk and if surgery would be indicated at an earlier disease stage in these patients. Of note, SNPs in the vitamin D binding protein also influence circulating vitamin D levels [25]. Accordingly, these SNPs may be of interest in patients with PHPT and should be evaluated in further studies.

The combined measurement of the vitamin D metabolites 25(OH)D and 1,25(OH)<sub>2</sub>D in the present study increases the understanding of the effects of vitamin D on bone. As the sample size is rather small, the results need to be confirmed in larger follow-up studies. Our findings highlight potential deleterious effects of increased 1,25(OH)<sub>2</sub>D on cortical bone in patients with PHPT. Supplementation with vitamin D in PHPT-patients with

**Table 6.** Relations between the genotype variations of the SNPs studied and bone mineral density in lumbar spine, femoral neck and distal radius.

| rs number                           | Genotype             |         | Bone mineral density (g/cm <sup>2</sup> ) |              |              |
|-------------------------------------|----------------------|---------|-------------------------------------------|--------------|--------------|
|                                     |                      |         | Radius                                    | Lumbar spine | Femoral neck |
|                                     | Frequency            | n (%)   |                                           |              |              |
| <b>VDR</b>                          |                      |         |                                           |              |              |
| rs1544410                           | GG                   | 19 (37) | 0.48 (0.09)                               | 1.14 (0.17)  | 0.85 (0.13)  |
|                                     | GA                   | 26 (50) | 0.46 (0.12)                               | 1.03 (0.19)  | 0.79 (0.12)  |
|                                     | AA                   | 7 (13)  | 0.46 (0.08)                               | 1.00 (0.16)  | 0.72 (0.07)  |
|                                     | p-value <sup>1</sup> |         | 0.39                                      | 0.046        | 0.036        |
|                                     | p-value <sup>2</sup> |         | 0.88                                      | 0.41         | 0.065        |
| rs7975232                           | CC                   | 11 (21) | 0.50 (0.08)                               | 1.21 (0.16)  | 0.87 (0.12)  |
|                                     | CA                   | 31 (61) | 0.47 (0.12)                               | 1.04 (0.17)  | 0.80 (0.13)  |
|                                     | AA                   | 9 (18)  | 0.44 (0.10)                               | 1.01 (0.19)  | 0.74 (0.09)  |
|                                     | p-value <sup>1</sup> |         | 0.21                                      | 0.003        | 0.032        |
|                                     | p-value <sup>2</sup> |         | 0.79                                      | 0.47         | 0.26         |
| rs2228570                           | CC                   | 18 (35) | 0.47 (0.10)                               | 1.05 (0.16)  | 0.80 (0.10)  |
|                                     | CT                   | 27 (52) | 0.47 (0.11)                               | 1.07 (0.21)  | 0.81 (0.15)  |
|                                     | TT                   | 7 (13)  | 0.48 (0.10)                               | 1.10 (0.16)  | 0.79 (0.09)  |
|                                     | p-value <sup>1</sup> |         | 0.35                                      | 0.49         | 0.95         |
|                                     | p-value <sup>2</sup> |         | 0.87                                      | 0.57         | 0.70         |
| <b>25-hydroxylase (Cyp2R1)</b>      |                      |         |                                           |              |              |
| rs10741657                          | GG                   | 23 (44) | 0.49 (0.11)                               | 1.09 (0.17)  | 0.81 (0.13)  |
|                                     | GA                   | 18 (35) | 0.48 (0.10)                               | 1.11 (0.21)  | 0.83 (0.14)  |
|                                     | AA                   | 11 (21) | 0.42 (0.10)                               | 0.95 (0.12)  | 0.75 (0.08)  |
|                                     | p-value <sup>1</sup> |         | 0.10                                      | 0.38         | 0.84         |
|                                     | p-value <sup>2</sup> |         | 0.145                                     | 0.039        | 0.25         |
| <b>24-hydroxylase (Cyp24a1)</b>     |                      |         |                                           |              |              |
| rs6013897                           | TT                   | 19 (36) | 0.50 (0.10)                               | 1.15 (0.16)  | 0.82 (0.11)  |
|                                     | TA                   | 29 (56) | 0.46 (0.10)                               | 1.02 (0.18)  | 0.80 (0.11)  |
|                                     | AA                   | 4 (8)   | 0.42 (0.14)                               | 1.03 (0.23)  | 0.78 (0.27)  |
|                                     | p-value <sup>1</sup> |         | 0.26                                      | 0.018        | 0.83         |
|                                     | p-value <sup>2</sup> |         | 0.40                                      | 0.83         | 0.86         |
| rs2762939                           | GG                   | 24 (46) | 0.48 (0.10)                               | 1.05 (0.17)  | 0.80 (0.10)  |
|                                     | GC                   | 25 (48) | 0.47 (0.11)                               | 1.08 (0.21)  | 0.83 (0.14)  |
|                                     | CC                   | 3 (6)   | 0.42 (0.10)                               | 1.04 (0.07)  | 0.67 (0.03)  |
|                                     | p-value <sup>1</sup> |         | 0.74                                      | 0.57         | 0.60         |
|                                     | p-value <sup>2</sup> |         | 0.52                                      | 0.99         | 0.13         |
| <b>1-alfa hydroxylase (Cyp27B1)</b> |                      |         |                                           |              |              |
| rs10877012                          | GG                   | 27 (53) | 0.46 (0.11)                               | 1.09 (0.19)  | 0.79 (0.11)  |
|                                     | GT                   | 18 (35) | 0.47 (0.10)                               | 1.03 (0.17)  | 0.82 (0.14)  |
|                                     | TT                   | 6 (12)  | 0.49 (0.07)                               | 1.05 (0.19)  | 0.80 (0.12)  |
|                                     | p-value <sup>1</sup> |         | 0.77                                      | 0.24         | 0.95         |
|                                     | p-value <sup>2</sup> |         | 0.52                                      | 0.97         | 0.46         |

SNP, single nucleotide polymorphism; VDR, vitamin D receptor.

<sup>1</sup>p-values are based on linear regression with age, gender and body mass index as covariates. Minor allele considered as dominant.

<sup>2</sup>p-values are based on linear regression with age, gender and body mass index as covariates. Minor allele considered as recessive. After Bonferroni-correction a p-value <0.007 is considered to be statistically significant.

doi:10.1371/journal.pone.0056019.t006

low 25(OH)D has been recommended. Randomized, prospective studies are necessary to conclude on safety of vitamin D supplementation and the effect on bone in PHPT.

### Author Contributions

Conceived and designed the experiments: MHEC JEV GM EAL. Performed the experiments: MHEC. Analyzed the data: MHEC EMA

GM EAL. Contributed reagents/materials/analysis tools: GM EAL. Wrote the paper: MHEC EMA YN JEV GM EAL.

## References

- Fraser WD (2009) Hyperparathyroidism. *Lancet* 374: 145–158.
- Bollerslev J, Jansson S, Mollerup CL, Nordenstrom J, Lundgren E, et al. (2007) Medical observation, compared with parathyroidectomy, for asymptomatic primary hyperparathyroidism: a prospective, randomized trial. *J Clin Endocrinol Metab* 92: 1687–1692.
- Vestergaard P, Mollerup CL, Frokjaer VG, Christiansen P, Blichert-Toft M, et al. (2000) Cohort study of risk of fracture before and after surgery for primary hyperparathyroidism. *BMJ* 321: 598–602.
- Omdahl JL, Morris HA, May BK (2002) Hydroxylase enzymes of the vitamin D pathway: expression, function, and regulation. *Annu Rev Nutr* 22: 139–166.
- van Driel M, Koedam M, Buurman CJ, Hewison M, Chiba H, et al. (2006) Evidence for auto/paracrine actions of vitamin D in bone: 1 $\alpha$ -hydroxylase expression and activity in human bone cells. *FASEB J* 20: 2417–2419.
- Goltzman D, Miao D, Panda DK, Hendy GN (2004) Effects of calcium and of the Vitamin D system on skeletal and calcium homeostasis: lessons from genetic models. *J Steroid Biochem Mol Biol* 89–90: 485–489.
- Lips P (2001) Vitamin D deficiency and secondary hyperparathyroidism in the elderly: consequences for bone loss and fractures and therapeutic implications. *Endocr Rev* 22: 477–501.
- Boudou P, Ibrahim F, Cormier C, Sarfati E, Souberbielle JC (2006) A very high incidence of low 25 hydroxy-vitamin D serum concentration in a French population of patients with primary hyperparathyroidism. *J Endocrinol Invest* 29: 511–515.
- Moosgaard B, Vestergaard P, Heickendorff L, Melsen F, Christiansen P, et al. (2005) Vitamin D status, seasonal variations, parathyroid adenoma weight and bone mineral density in primary hyperparathyroidism. *Clin Endocrinol (Oxf)* 63: 506–513.
- Jones G, Prosser DE, Kaufmann M (2011) 25-Hydroxyvitamin D-24-hydroxylase (CYP24A1): Its important role in the degradation of vitamin D. *Arch Biochem Biophys*.
- Tashiro K, Abe T, Oue N, Yasui W, Ryoji M (2004) Characterization of vitamin D-mediated induction of the CYP 24 transcription. *Mol Cell Endocrinol* 226: 27–32.
- Holick MF (1995) Environmental factors that influence the cutaneous production of vitamin D. *Am J Clin Nutr* 61: 638S–645S.
- Macdonald HM, Mavroceidi A, Barr RJ, Black AJ, Fraser WD, et al. (2008) Vitamin D status in postmenopausal women living at higher latitudes in the UK in relation to bone health, overweight, sunlight exposure and dietary vitamin D. *Bone* 42: 996–1003.
- Christensen MH, Lien EA, Hustad S, Almas B (2010) Seasonal and age-related differences in serum 25-hydroxyvitamin D, 1,25-dihydroxyvitamin D and parathyroid hormone in patients from Western Norway. *Scand J Clin Lab Invest* 70: 281–286.
- Hunter D, De Lange M, Snieder H, MacGregor AJ, Swaminathan R, et al. (2001) Genetic contribution to bone metabolism, calcium excretion, and vitamin D and parathyroid hormone regulation. *J Bone Miner Res* 16: 371–378.
- Norman AW, Bishop JE, Bula CM, Olivera CJ, Mizwicki MT, et al. (2002) Molecular tools for study of genomic and rapid signal transduction responses initiated by 1  $\alpha$ ,25(OH) $_2$ -vitamin D(3). *Steroids* 67: 457–466.
- Fang Y, van Meurs JB, Rivadeneira F, van Schoor NM, van Leeuwen JP, et al. (2007) Vitamin D receptor gene haplotype is associated with body height and bone size. *J Clin Endocrinol Metab* 92: 1491–1501.
- Grimmes G, Almaas B, Eggen AE, Emaus N, Figenschau Y, et al. (2010) Effect of smoking on the serum levels of 25-hydroxyvitamin D depends on the assay employed. *Eur J Endocrinol* 163: 339–348.
- Holm PI, Ueland PM, Kvalheim G, Lien EA (2003) Determination of choline, betaine, and dimethylglycine in plasma by a high-throughput method based on normal-phase chromatography-tandem mass spectrometry. *Clin Chem* 49: 286–294.
- Levey AS, Coresh J, Greene T, Marsh J, Stevens LA, et al. (2007) Expressing the Modification of Diet in Renal Disease Study equation for estimating glomerular filtration rate with standardized serum creatinine values. *Clin Chem* 53: 766–772.
- Ramos-Lopez E, Kahles H, Weber S, Kukic A, Penna-Martinez M, et al. (2008) Gestational diabetes mellitus and vitamin D deficiency: genetic contribution of CYP27B1 and CYP2R1 polymorphisms. *Diabetes Obes Metab* 10: 683–685.
- Shen H, Bielak LF, Ferguson JF, Streeten EA, Yerges-Armstrong LM, et al. (2010) Association of the vitamin D metabolism gene CYP24A1 with coronary artery calcification. *Arterioscler Thromb Vasc Biol* 30: 2648–2654.
- Simon KC, Munger KL, Kraft P, Hunter DJ, De Jager PL, et al. (2011) Genetic predictors of 25-hydroxyvitamin D levels and risk of multiple sclerosis. *J Neurol* 258: 1676–1682.
- Uitterlinden AG, Ralston SH, Brandi ML, Carey AH, Grinberg D, et al. (2006) The association between common vitamin D receptor gene variations and osteoporosis: a participant-level meta-analysis. *Ann Intern Med* 145: 255–264.
- Wang TJ, Zhang F, Richards JB, Kestenbaum B, van Meurs JB, et al. (2010) Common genetic determinants of vitamin D insufficiency: a genome-wide association study. *Lancet* 376: 180–188.
- Russell RG, Espina B, Hulley P (2006) Bone biology and the pathogenesis of osteoporosis. *Curr Opin Rheumatol* 18 Suppl 1: S3–10.
- Langsetmo L, Hitchcock CL, Kingwell EJ, Davison KS, Berger C, et al. (2012) Physical activity, body mass index and bone mineral density-associations in a prospective population-based cohort of women and men: the Canadian Multicentre Osteoporosis Study (CaMos). *Bone* 50: 401–408.
- Purcell S, Neale B, Todd-Brown K, Thomas L, Ferreira MA, et al. (2007) PLINK: a tool set for whole-genome association and population-based linkage analyses. *Am J Hum Genet* 81: 559–575.
- Moosgaard B, Christensen SE, Vestergaard P, Heickendorff L, Christiansen P, et al. (2008) Vitamin D metabolites and skeletal consequences in primary hyperparathyroidism. *Clin Endocrinol (Oxf)* 68: 707–715.
- Ueno Y, Shinki T, Nagai Y, Murayama H, Fujii K, et al. (2003) In vivo administration of 1,25-dihydroxyvitamin D $_3$  suppresses the expression of RANKL mRNA in bone of thyroparathyroidectomized rats constantly infused with PTH. *J Cell Biochem* 90: 267–277.
- Lacey DL, Timms E, Tan HL, Kelley MJ, Dunstan CR, et al. (1998) Osteoprotegerin ligand is a cytokine that regulates osteoclast differentiation and activation. *Cell* 93: 165–176.
- Hsu H, Lacey DL, Dunstan CR, Solovyev I, Colombero A, et al. (1999) Tumor necrosis factor receptor family member RANK mediates osteoclast differentiation and activation induced by osteoprotegerin ligand. *Proc Natl Acad Sci U S A* 96: 3540–3545.
- Suda T, Ueno Y, Fujii K, Shinki T (2003) Vitamin D and bone. *J Cell Biochem* 88: 259–266.
- Silverberg SJ, Shane E, de la Cruz L, Dempster DW, Feldman F, et al. (1989) Skeletal disease in primary hyperparathyroidism. *J Bone Miner Res* 4: 283–291.
- Rubin MR, Bilezikian JP, McMahon DJ, Jacobs T, Shane E, et al. (2008) The natural history of primary hyperparathyroidism with or without parathyroid surgery after 15 years. *J Clin Endocrinol Metab* 93: 3462–3470.
- Christiansen P, Steiniche T, Brockstedt H, Mosekilde L, Hesse I, et al. (1993) Primary hyperparathyroidism: iliac crest cortical thickness, structure, and remodeling evaluated by histomorphometric methods. *Bone* 14: 755–762.
- Holick MF, Binkley NC, Bischoff-Ferrari HA, Gordon CM, Hanley DA, et al. (2011) Evaluation, treatment, and prevention of vitamin D deficiency: an Endocrine Society clinical practice guideline. *J Clin Endocrinol Metab* 96: 1911–1930.
- IOM (2010) Dietary reference intakes for calcium and vitamin D. National Academies Press: Institute of Medicine.
- Lips P, Bouillon R, van Schoor NM, Vanderschueren D, Verschueren S, et al. (2010) Reducing fracture risk with calcium and vitamin D. *Clin Endocrinol (Oxf)* 73: 277–285.
- Bischoff-Ferrari HA (2008) Optimal serum 25-hydroxyvitamin D levels for multiple health outcomes. *Adv Exp Med Biol* 624: 55–71.
- Bilezikian JP, Khan AA, Potts JT, Jr. (2009) Guidelines for the management of asymptomatic primary hyperparathyroidism: summary statement from the third international workshop. *J Clin Endocrinol Metab* 94: 335–339.
- Bollerslev J, Marcocci C, Sosa M, Nordenstrom J, Bouillon R, et al. (2011) Current evidence for recommendation of surgery, medical treatment and vitamin D repletion in mild primary hyperparathyroidism. *Eur J Endocrinol* 165: 851–864.
- Rao RR, Randeve H, Sankaranarayanan S, Narashima M, Møllig M, et al. (2012) Prolonged treatment with vitamin D in postmenopausal women with primary hyperparathyroidism. *Endocrine connections* 01: 13–21.
- Grey A, Lucas J, Horne A, Gamble G, Davidson JS, et al. (2005) Vitamin D repletion in patients with primary hyperparathyroidism and coexistent vitamin D insufficiency. *J Clin Endocrinol Metab* 90: 2122–2126.
- Kantorovich V, Gacad MA, Seeger LL, Adams JS (2000) Bone mineral density increases with vitamin D repletion in patients with coexistent vitamin D insufficiency and primary hyperparathyroidism. *J Clin Endocrinol Metab* 85: 3541–3543.
- Bollerslev J, Gram J, Nielsen HK, Brixen K, Storm T, et al. (1991) Effect of a short course of 1,25-dihydroxyvitamin D $_3$  on biochemical markers of bone remodeling in adult male volunteers. *Bone* 12: 339–343.
- Mosekilde L, Charles P, Lindgreen P (1989) Determinants for serum 1,25-dihydroxycholecalciferol in primary hyperparathyroidism. *Bone Miner* 5: 279–290.
- Dundar U, Solak M, Kavuncu V, Ozdemir M, Cakir T, et al. (2009) Evidence of association of vitamin D receptor Apa I gene polymorphism with bone mineral density in postmenopausal women with osteoporosis. *Clin Rheumatol* 28: 1187–1191.
- Flicker L, Hopper JL, Rodgers L, Kaymakci B, Green RM, et al. (1995) Bone density determinants in elderly women: a twin study. *J Bone Miner Res* 10: 1607–1613.
